# Supplementary material for: Interaction of the NAMI-A complex with nitric oxide under physiological conditions
Source: Royal Society of Chemistry journal article supplement (doi:10.1039/c3nj01631e), 2014-01-01
Supplement: c3nj01631e1.pdf [file c3nj01631e1.pdf]

## Supporting Information

### Interaction of NAMI-A complex with nitric oxide under physiological conditions

Maria Oszajca,<sup>a</sup> Ewa Kuliś,<sup>a</sup> Grażyna Stochel<sup>a</sup> and Malgorzata Brindell<sup>\*a</sup>

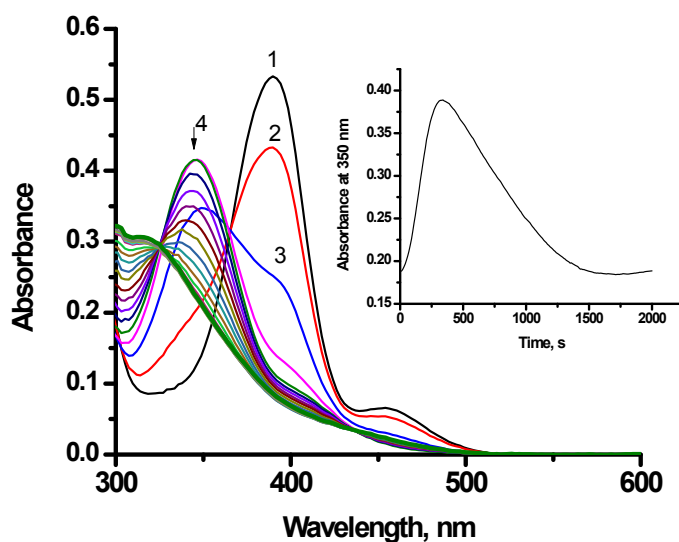

**Figure S1.** Spectral changes observed during the hydrolysis of NAMI-A. Spectra recorded for 2000 s every 100 s, 1, 2, 3, 4 – denote first, second, third and fourth registered spectrum. Experimental conditions: [Tris buffer] = 0.1 M, pH = 7.4, 37 °C, 0.2 M NaCl. Inset: Absorbance changes at 350 nm as a function of time.

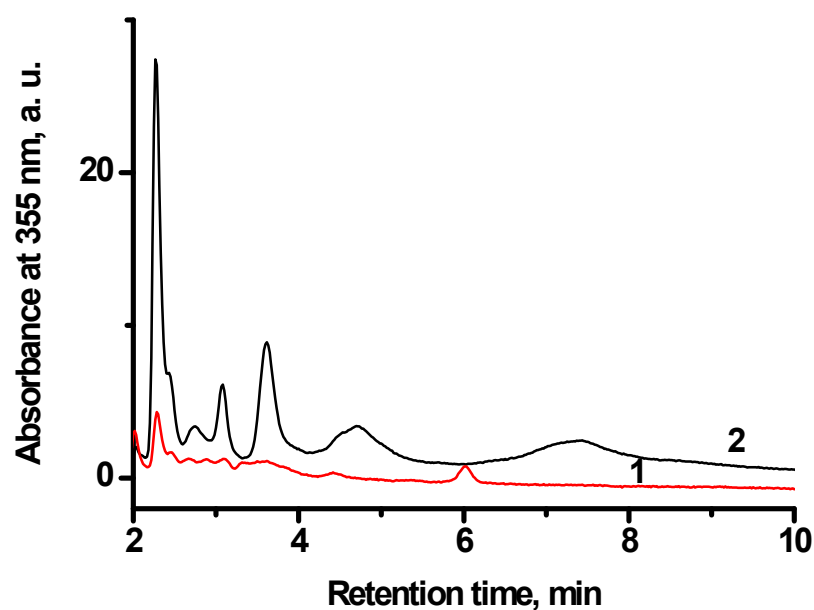

**Figure S2.** Comparison of the elution profiles registered at 355 nm for NAMI-A kept for 30 min in buffer solution in the presence (1 - red line) and the absence (2 - black line) of nitric oxide. Experimental conditions: [NAMI-A] = 0.5 mM, [NO] = 1 mM, [Tris buffer] = 0.1 M, pH = 7.4, [NaCl] = 0.2 M, 37 °C.

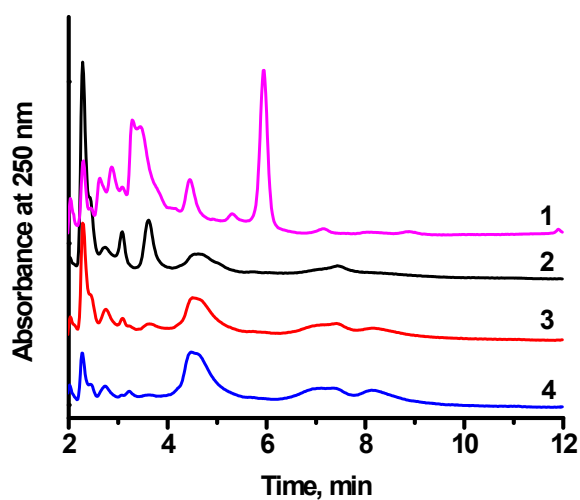

**Figure S3.** Comparison of the elution profiles registered at 250 nm for NAMI-A kept for 30 min in buffer solution in the presence (1 - pink line) of nitric oxide and in the absence of nitric oxide for 30 (2 - black line), 45 (3 - red line) and 60 min (4 - blue line). Experimental conditions: [NAMI-A] = 0.5 mM, [NO] = 1 mM, [Tris buffer] = 0.1 M, pH = 7.4, [NaCl] = 0.2 M, 37 °C.

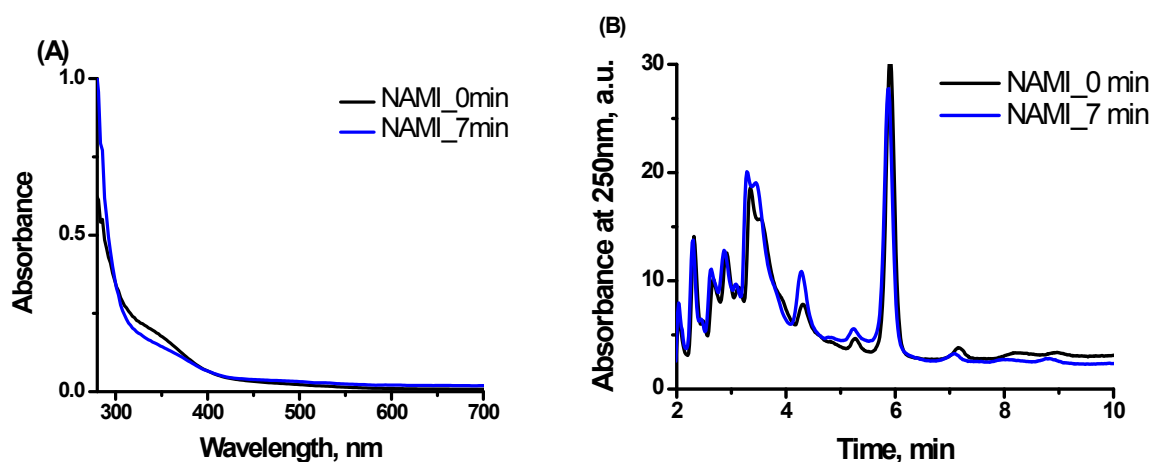

**Figure S4.** Comparison of the UV-Vis spectra and elution profiles obtained after 30 min reaction of NO with NAMI-A. NAMI-A complex freshly prepared (black line) and 7 min pre-equilibrated with Tris buffer prior NO addition (blue line). Experimental conditions: [NAMI-A] = 0.5 mM, [NO] = 1 mM, [NaCl] = 0.2 M, [Tris buffer] = 0.1 M, pH = 7.4, 37 °C.

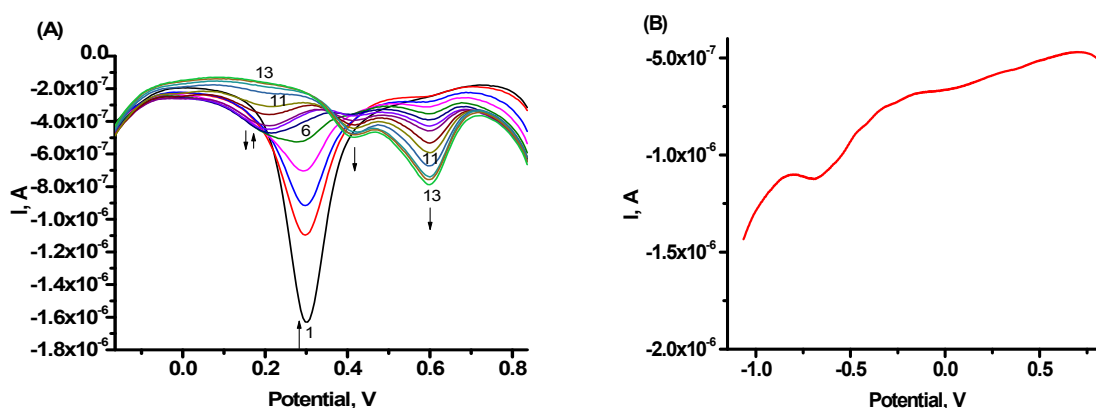

**Figure S5.** Differential pulse voltammograms representing electrochemical response: (A) after mixing of NAMI-A complex with Tris buffer (pH = 7.4) recorded every 5 minutes (1-7) or 30 minutes 8-13; (B) after mixing of NAMI-A complex with Tris buffer (pH = 7.4) containing NO. Experimental conditions: [NAMI-A] = 0.5 mM, [Tris buffer] = 0.1 M, pH = 7.4, [NaCl] = 0.2 M, [NO] = 1 mM, T = 37 °C.

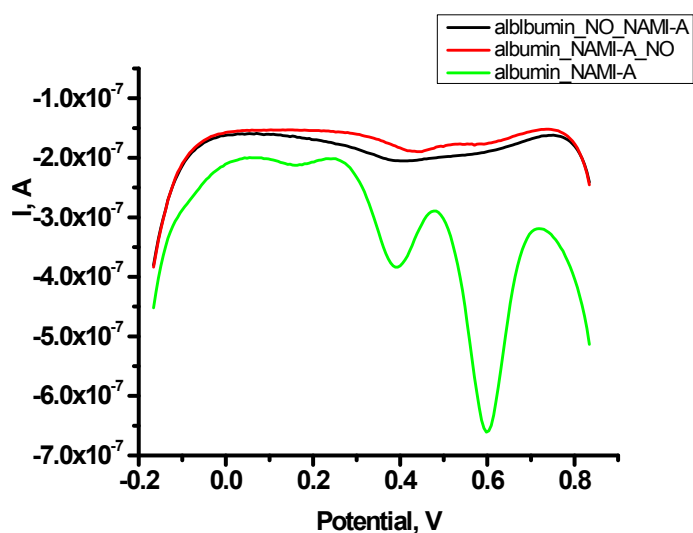

**Figure S6.** Differential pulse voltammograms representing electrochemical response: after mixing of NAMI-A complex with mixture of albumin and NO (black line); after incubating NAMI-A with albumin for 30 min and then with NO for another 30 min (red line); after incubating NAMI-A with albumin (green line). Experimental conditions: [NAMI-A] = 0.5 mM, [Tris buffer] = 0.1 M, pH = 7.4, [NaCl] = 0.2 M, [NO] = 1 mM, [albumin] = 0.025 mM T = 37 °C.
